# Supplementary material for: [Retracted] Screening of Adverse Prognostic Factors and Construction of Prognostic Index in Previously Untreated Concurrent Follicular Lymphoma and Diffuse Large B‐Cell Lymphoma
Source: Hindawi journal article supplement (doi:10.1155/2022/4379556), 2022-01-01
Supplement: f1 [file 4379556.f1.docx]

**Supplementary Information for**

Screening of Adverse Prognostic Factors and Construction of Prognostic Index in Previously Untreated Concurrent Follicular Lymphoma and Diffuse Large B-Cell Lymphoma

**Supplementary Table 1.** The baseline characteristics of FL/DLBCL groups.

| Characteristics | FL/DLBCL (n=121) |
| --- | --- |
| Age |  |
| <60 years | 63 (52%) |
| ≥60 years | 58 (48%) |
| Sex |  |
| male | 63 (52%) |
| Female | 58 (48) |
| DLBCL component |  |
| <50% of DLBCL | 72 (60%) |
| ≥50% of DLBCL | 49 (40%) |
| Cell of origin (COO) |  |
| GCB | 71 (59%) |
| non-GCB | 50 (41%) |
| FL grade |  |
| 1-3a | 77(64%) |
| 3b | 44 (36%) |
| B symptoms |  |
| no | 86 (71%) |
| yeas | 35 (29%) |
| ECOG |  |
| <2 | 103 (85%) |
| ≥2 | 18 (15%) |
| Ann Arbor stage |  |
| I-II | 65 (54%) |
| III-IV | 56 (46%) |
| Extranidal involvement |  |
| no | 56 (46%) |
| yes | 65 (54%) |
| Bone marrow involvement |  |
| no | 78 (64%) |
| yes | 43 (36%) |
| Splenic involvement |  |
| no | 85 (70%) |
| yeas | 36 (30%) |
| Hemoglobin |  |
| ≥12g/L | 100 (83%) |
| <12g/L | 21 (17%) |
| Serum LDH |  |
| normal | 48 (57%) |
| elevated | 52 (43%) |
| Serum β2m |  |
| normal | 54 (62%) |
| elevated | 46 (38%) |
| Number of nodal areas |  |
| <4 | 51 (60%) |
| ≥4 | 49 (40%) |
| IPI |  |
| Low risk | 30 (25%) |
| Low Intermediate risk | 43 (36%) |
| High Intermediate risk | 29 (24%) |
| High risk | 19 (15%) |
| FLIPI |  |
| Low risk | 43 (36%) |
| Intermediate risk | 38 (31%) |
| High risk | 40 (33%) |
| FLIPI2 |  |
| Low risk | 44 (37%) |
| Intermediate risk | 37 (30%) |
| High risk | 40 (33%) |
| Treatment |  |
| R-chemo | 71 (59%) |
| chemo | 50 (41%) |
| Response to therapy |  |
| CR | 64 (53%) |
| ORR | 88 (73%) |
| Relapse/progression |  |
| PFS at 5 year (95% CI) | 59% (41-73) |
| OS at 5 year (95% CI) | 70% (57-89) |

Abbreviations: DLBCL, diffuse large B-cell lymphoma; FL, follicular lymphoma, FL/DLBCL, FL with a DLBC component; GCB, germinal center B-cell like DLBCL; non-GCB, non-germinal center B-cell like DLBCL; ECOG, Eastern Cooperative Oncology Group; LDH, lactate dehydrogenase; β2m, β2-microglobulin; IPI, International Prognostic Index; FLIPI, Follicular Lymphoma International Prognostic Index; FLIPI2, Follicular Lymphoma International Prognostic Index 2; PFS, Progression Free Survival; OS, overall survival; CI, Confidence Interval.

**Supplementary Table 2**. The baseline characteristics of *pure* FL 1-3a groups.

| Characteristics | FL grades 1-3a |
| --- | --- |
| (n=471) |
| Age |  |
| <60 years | 327 (69%) |
| ≥60 years | 144 (31%) |
| Sex |  |
| male | 226 (48%) |
| female | 245 (52%) |
| B symptoms |  |
| no | 402 (85%) |
| yeas | 69 (15%) |
| ECOG |  |
| <2 | 444 (94%) |
| ≥2 | 27 (6%) |
| Ann Arbor stage |  |
| I-II | 112 (24%) |
| III-IV | 359 (76%) |
| Extranodal involvement |  |
| no | 287 (61%) |
| yes | 184 (39%) |
| Bone marrow involvement |  |
| no | 405 (86%) |
| yes | 66 (14%) |
| Splenic involvement |  |
| no | 333 (75%) |
| yeas | 118 (25%) |
| Hemoglobin |  |
| ≥12g/L | 382 (81%) |
| <12g/L | 89 (19%) |
| Serum LDH |  |
| normal | 397 (84%) |
| elevated | 74 (16%) |
| Serum β2m |  |
| normal | 329 (70%) |
| elevated | 142 (30%) |
| Number of nodal areas |  |
| <4 | 117 (38%) |
| ≥4 | 294 (62%) |
| Treatment |  |
| R-chemotherapy | 347 (73%) |
| chemotherapy | 124 (27%) |
| Relapse/progression |  |
| PFS at 5 year (95% CI) | 70% (64-79) |
| OS at 5 year (95% CI) | 80% (76-89) |

Abbreviations: FL, Follicular Lymphoma; ECOG, Eastern Cooperative Oncology Group; LDH, lactate dehydrogenase; β2m, β2-microglobulin; PFS, Progression Free Survival; OS, overall survival; CI, Confidence Interval.

**Supplementary Table 3.** The baseline characteristics of *de novo* DLBCL groups.

| Characteristics | *de novo* DLBCL |
| --- | --- |
| (n=529) |
| Age |  |
| <60 years | 319 (60%) |
| ≥60 years | 210 (40%) |
| Sex |  |
| male | 277 (52%) |
| female | 252 (48%) |
| Cell of origin (COO) |  |
| GCB | 252 (48%) |
| non-GCB | 277 (52%) |
| B symptoms |  |
| no | 428 (81%) |
| yeas | 101 (9%) |
| ECOG |  |
| <2 | 431 (81%) |
| ≥2 | 98 (19%) |
| Ann Arbor stage ≥ III |  |
| I-II | 257 (49%) |
| III-IV | 272 (51%) |
| Extranodal involvement |  |
| no | 220 (42%) |
| yes | 309 (58%) |
| Bone marrow involvement |  |
| no | 387 (73%) |
| yes | 142 (27%) |
| Splenic involvement |  |
| no | 365 (69%) |
| yeas | 164 (31%) |
| Hemoglobin |  |
| ≥12g/L | 295 (56%) |
| <12g/L | 234 (44%) |
| Serum LDH |  |
| normal | 315 (60%) |
| elevated | 214 (40%) |
| Serum β2m |  |
| normal | 222 (42%) |
| elevated | 307 (58%) |
| Number of nodal areas |  |
| <4 | 344 (65%) |
| ≥4 | 185 (35%) |
| Treatment |  |
| R-chemotherapy | 332 (63%) |
| chemotherapy | 197 (37%) |
| Relapse/progression |  |
| PFS at 5 year (95% CI) | 48% (44-57) |
| OS at 5 year (95% CI) | 60% (56-67) |

Abbreviations: DLBCL, Diffuse large B-cell lymphoma; GCB, germinal center B-cell like DLBCL; non-GCB, non-germinal center B-cell like DLBCL.

**Supplementary Table 4.** Prognostic score from nomogram.

| Risk Factor | Points |
| --- | --- |
| FL grade |  |
| 1-3a | 0 |
| 3b | 100 |
| Cell of origin (COO) |  |
| GCB | 0 |
| non-GCB | 63 |
| Ann Arbor stage |  |
| I-II | 0 |
| III-IV | 45 |

According to the points of each variable in the nomogram, calculate the total points of each patient, and then arrange the total points of all patients from the lowest to the highest, and divide them into four risk groups by quadrilateral method, the top 25%, 26-50%, 51-75%, and the bottom 25%, respectively, and name them as Low risk, Low Intermediate risk, High Intermediate risk and High risk, respectively.


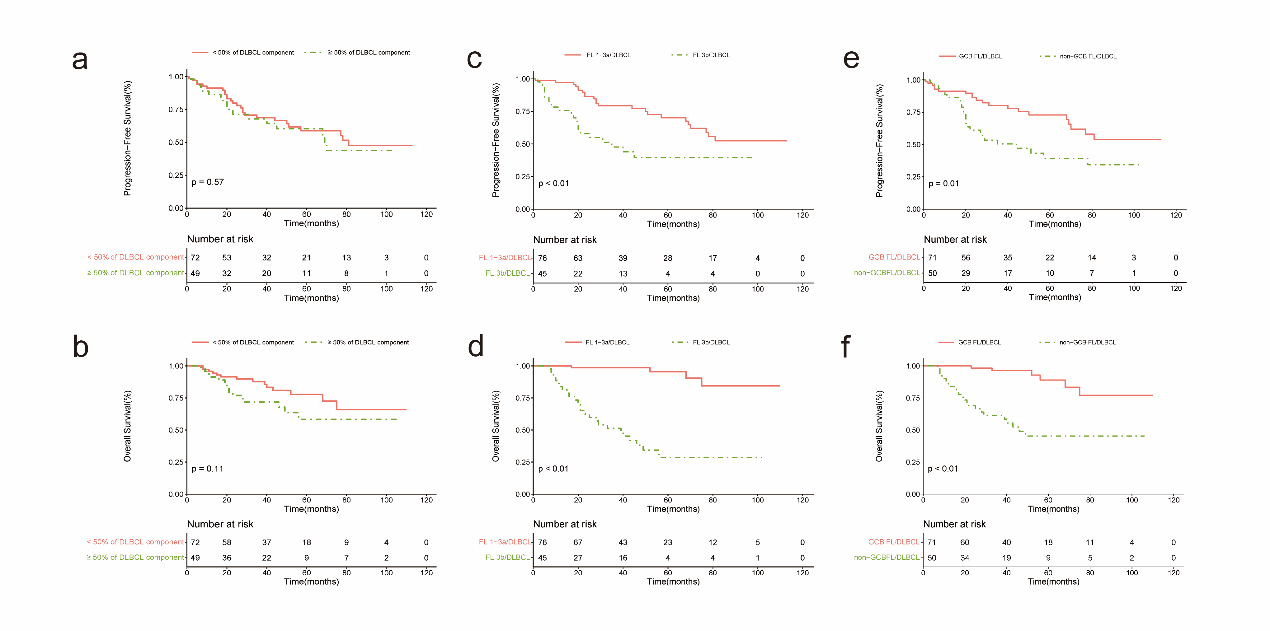


**Supplementary figure 1.** Kaplan-Meier survival curves according to proportion of DLBCL component (a, b), FL grade (c, d), and cell of origin (e, f). Abbreviations: DLBCL component, FL with the percentage of DLBC component; GCB, germinal center B-cell like DLBCL; non-GCB, non-germinal center B-cell like DLBCL.


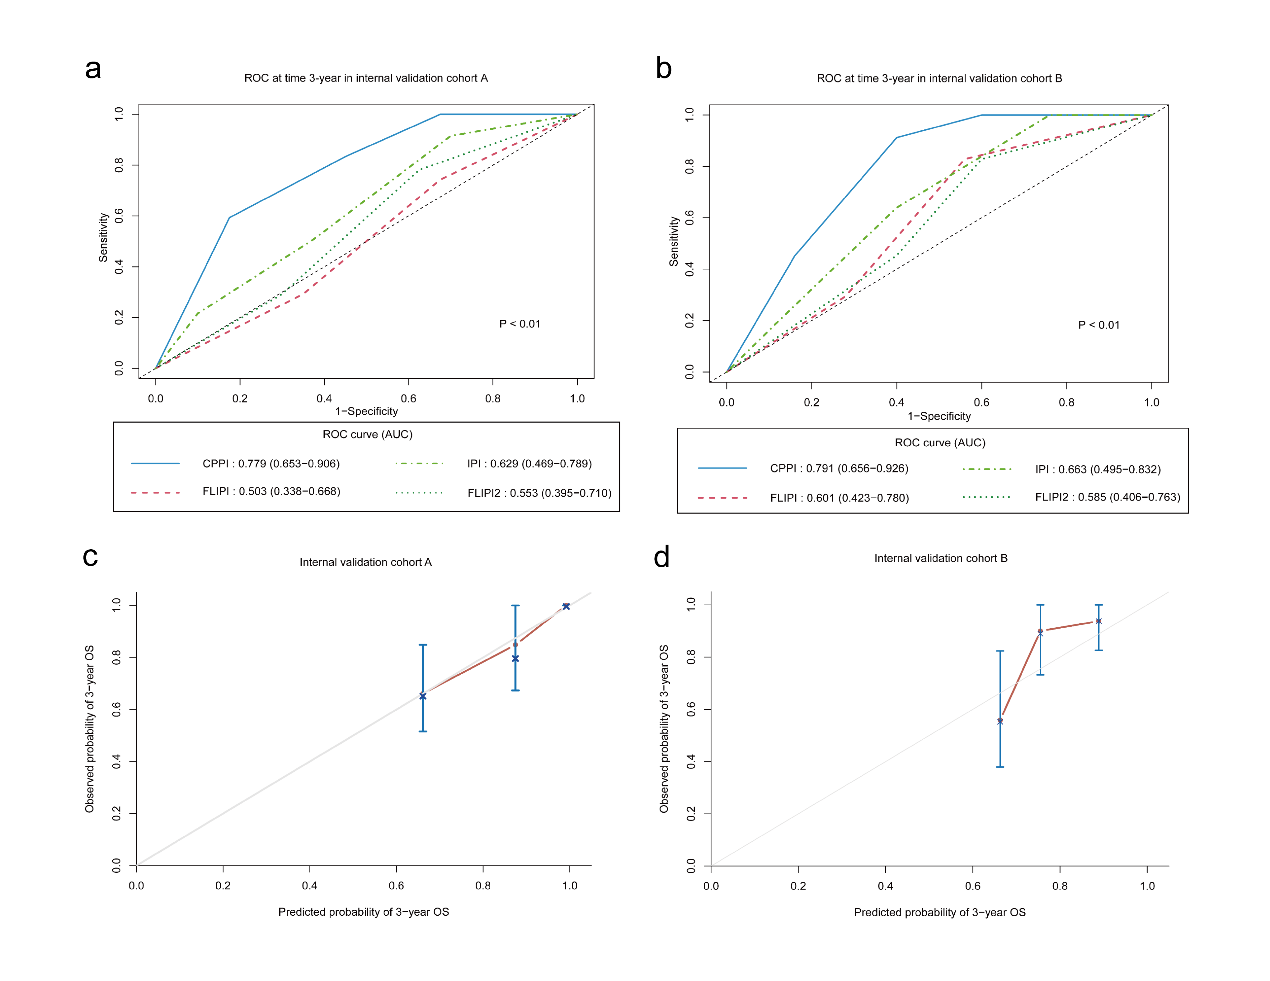


**Supplementary figure 2.** ROC curves and calibration curves for predictions of 3-year OS in internal validation cohort A (a, c) and internal validation cohort B (b, d). Abbreviations: ROC, Receiver Operator Characteristic; AUC, Area Under the Curve.


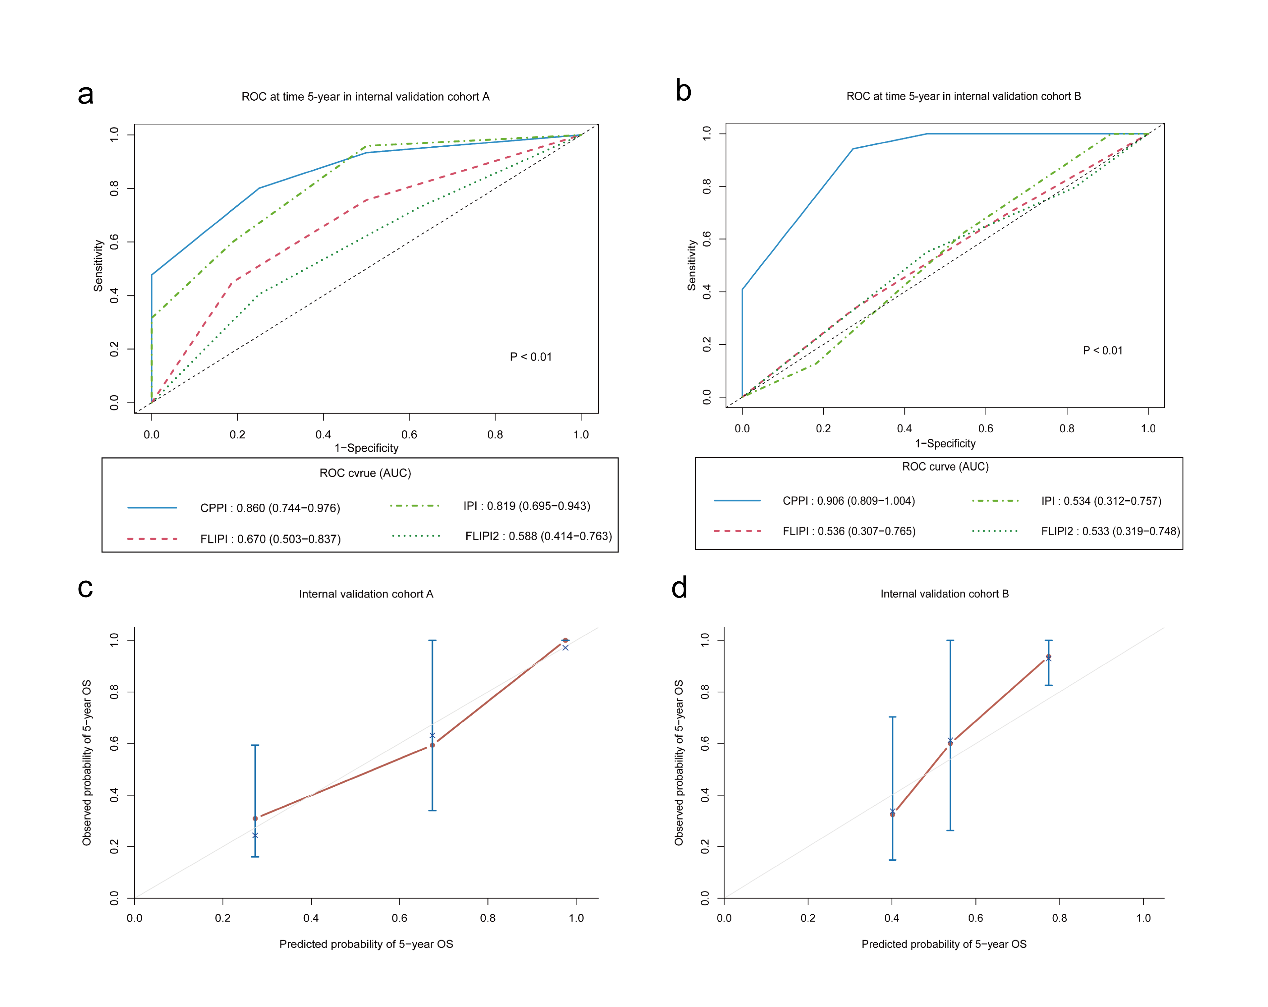


**Supplementary figure 3.** ROC curves and calibration curves for predictions of 5-year OS in internal validation cohort A (a, c) and internal validation cohort B (b, d). Abbreviations: ROC, Receiver Operator Characteristic; AUC, Area Under the Curve.
